# Supplementary material
Source: PubMed Central journal article supplement (PMC6660151)
Supplement: NIHMS1022350-supplement-1.pdf [file NIHMS1022350-supplement-1.pdf]

Table S2: GWAS results: SNPs observed with p<1 X10-5

| SNP         | CHR | BP          | A1 | A2 | MAF   | INFO  | OR   | P       | Direction | HetDef | HetPVal | N_Cases | N_controls | ANNOT                                                                                                                                                  | eQTL_LCL (p<0.001)                                                                          | Cerebellum eQTL | Parietal eQTL SCAN |
|-------------|-----|-------------|----|----|-------|-------|------|---------|-----------|--------|---------|---------|------------|--------------------------------------------------------------------------------------------------------------------------------------------------------|---------------------------------------------------------------------------------------------|-----------------|--------------------|
| rs4733767   | 8   | 128,581,578 | A  | G  | 0.274 | 0.867 | 1.21 | 7.1E-07 | +++++     | 6      | 0.8002  | 2688    | 7031       | CASC8(+87.19kb) CASC11(-131.3kb) CASC21(+176.7kb) CCAT2(+167.2kb) MYC(-166.7kb) POUSF1B(+152.1kb)                                                      |                                                                                             |                 |                    |
| rs1030757   | 4   | 93,697,153  | C  | A  | 0.488 | 0.979 | 1.18 | 1.1E-06 | +++++     | 6      | 0.8217  | 2688    | 7031       | GRID2(0)                                                                                                                                               |                                                                                             |                 |                    |
| rs12504244  | 4   | 55,485,188  | G  | C  | 0.393 | 0.974 | 1.18 | 1.6E-06 | +++++     | 6      | 0.1496  | 2688    | 7031       | KIT(-38.91kb)                                                                                                                                          |                                                                                             |                 |                    |
| rs13141765  | 4   | 6,243,646   | C  | T  | 0.393 | 0.713 | 1.31 | 1.9E-06 | ?+????    | 1      | 0.6212  | 1240    | 4671       | JAKMIP1(+41.33kb) LOC285484(+7.983kb) PPP2R2C(-78.66kb) WFS1(-27.93kb)                                                                                 |                                                                                             |                 |                    |
| rs35966570  | 8   | 128,582,726 | A  | G  | 0.270 | 0.858 | 1.21 | 2.0E-06 | +++++     | 6      | 0.8251  | 2688    | 7031       | CASC8(+88.34kb) CASC11(-130.1kb) CASC21(+177.8kb) CCAT2(+168.3kb) MYC(-165.6kb) POUSF1B(+153.3kb)                                                      |                                                                                             |                 |                    |
| rs34652305  | 8   | 128,582,680 | G  | T  | 0.271 | 0.859 | 1.20 | 2.1E-06 | +++++     | 6      | 0.8269  | 2688    | 7031       | CASC8(+88.3kb) CASC11(-130.2kb) CASC21(+177.8kb) CCAT2(+168.3kb) MYC(-165.6kb) POUSF1B(+153.2kb)                                                       |                                                                                             |                 |                    |
| rs116347760 | 1   | 114,201,251 | A  | T  | 0.020 | 0.793 | 1.88 | 2.4E-06 | ?++++     | 5      | 0.391   | 2597    | 6776       | AP4B1-AS1(-198kb) MAGI3(0) PHTF1(-38.57kb) PTPN22(-155.2kb) RSBN1(-103.2kb)                                                                            |                                                                                             |                 |                    |
| rs72781967  | 10  | 5,622,426   | C  | T  | 0.344 | 0.995 | 1.18 | 2.4E-06 | +++++     | 6      | 0.2766  | 2688    | 7031       | ASB13(-58.39kb) CALML3(+54.2kb) CALML3-AS1(+54.22kb) CALML5(+80.89kb) FAM208B(-104.4kb) GDI2(-184.8kb) NET1(+121.4kb) TUBAL3(+175.6kb)                 |                                                                                             |                 |                    |
| rs9999192   | 4   | 93,704,379  | G  | A  | 0.469 | 0.980 | 1.17 | 2.5E-06 | +++++     | 6      | 0.7398  | 2688    | 7031       | GRID2(0)                                                                                                                                               |                                                                                             |                 |                    |
| rs11253241  | 10  | 5,621,628   | T  | C  | 0.344 | 0.996 | 1.18 | 2.6E-06 | +++++     | 6      | 0.303   | 2688    | 7031       | ASB13(-59.19kb) CALML3(+53.4kb) CALML3-AS1(+53.42kb) CALML5(+80.1kb) FAM208B(-105.2kb) GDI2(-185.6kb) NET1(+120.6kb) TUBAL3(+174.8kb)                  |                                                                                             |                 |                    |
| rs55687617  | 7   | 56,775,429  | A  | G  | 0.119 | 0.881 | 0.76 | 2.7E-06 | ----      | 6      | 0.7023  | 2688    | 7031       | LOC100130849(-167.6kb) LOC101928401(+169.6kb)                                                                                                          |                                                                                             |                 |                    |
| rs113647785 | 4   | 55,519,345  | G  | A  | 0.362 | 0.882 | 1.19 | 2.9E-06 | +++++     | 6      | 0.7104  | 2688    | 7031       | KIT(-4.749kb)                                                                                                                                          |                                                                                             |                 |                    |
| rs7911497   | 10  | 5,624,369   | C  | T  | 0.344 | 0.996 | 1.18 | 2.9E-06 | +++++     | 6      | 0.2366  | 2688    | 7031       | ASB13(-56.45kb) CALML3(+56.14kb) CALML3-AS1(+56.16kb) CALML5(+82.84kb) FAM208B(-102.4kb) GDI2(-182.8kb) NET1(+123.4kb) TUBAL3(+177.6kb)                | GNA11, CDC26, LOC729948, MRPL43, LOC730314, WNT9B, PLEKHH3, CFL1                            |                 |                    |
| rs2046015   | 4   | 93,685,405  | T  | C  | 0.467 | 0.981 | 1.17 | 3.0E-06 | +++++     | 6      | 0.8246  | 2688    | 7031       | GRID2(0)                                                                                                                                               | CPZ, MESP1                                                                                  |                 |                    |
| rs4313119   | 8   | 128,571,855 | T  | G  | 0.243 | 0.915 | 1.20 | 3.2E-06 | +++++     | 6      | 0.6473  | 2688    | 7031       | CASC8(+77.47kb) CASC11(-141kb) CASC21(+167kb) CCAT2(+157.5kb) MYC(-176.5kb) POUSF1B(+142.4kb)                                                          |                                                                                             |                 |                    |
| rs7699688   | 4   | 93,704,900  | C  | T  | 0.470 | 0.977 | 1.17 | 3.2E-06 | +++++     | 6      | 0.7036  | 2688    | 7031       | GRID2(0)                                                                                                                                               | CPZ, MESP1                                                                                  |                 |                    |
| rs117310268 | 18  | 19,675,267  | T  | C  | 0.038 | 0.780 | 1.57 | 3.3E-06 | +++++     | 6      | 0.4098  | 2688    | 7031       | GATA6(-74.13kb) GATA6-AS1(-71.59kb)                                                                                                                    |                                                                                             |                 |                    |
| rs5019028   | 4   | 94,222,825  | G  | T  | 0.279 | 0.995 | 1.19 | 3.4E-06 | +++++     | 6      | 0.3878  | 2688    | 7031       | GRID2(0)                                                                                                                                               |                                                                                             |                 |                    |
| rs72783425  | 16  | 14,148,431  | A  | C  | 0.053 | 0.960 | 1.40 | 3.5E-06 | +++++     | 6      | 0.1763  | 2688    | 7031       | ERCC4(+102.2kb) LOC101927311(+38.56kb) LOC101927348(+33.5kb) MKL2(-16.76kb)                                                                            |                                                                                             |                 |                    |
| rs115870915 | 1   | 114,134,030 | A  | G  | 0.025 | 0.901 | 1.66 | 3.6E-06 | +++++     | 6      | 0.9124  | 2688    | 7031       | MAGI3(0) PHTF1(-105.8kb) RSBN1(-170.4kb)                                                                                                               |                                                                                             |                 |                    |
| rs954467    | 4   | 93,665,778  | C  | T  | 0.473 | 0.976 | 1.17 | 3.9E-06 | +++++     | 6      | 0.7044  | 2688    | 7031       | GRID2(0)                                                                                                                                               | CPZ, LOC100132474, PIN1, NME1, NME1-NME2, NME2, BTBD14B, MTHFD1, FSTL3                      |                 |                    |
| rs1511295   | 4   | 93,994,597  | C  | A  | 0.395 | 1.013 | 0.85 | 3.9E-06 | ----      | 6      | 0.06629 | 2688    | 7031       | GRID2(0)                                                                                                                                               | HNRNP3, GNG8, RBM6, CPZ, AIFM2, LOC730031, MLLT4, THUMP1, SART3, JUND, PCP2, ZMYND8, ZNF407 |                 |                    |
| rs56343802  | 2   | 139,823,241 | T  | A  | 0.281 | 0.999 | 1.19 | 4.0E-06 | +++++     | 6      | 0.6415  | 2688    | 7031       | YY1P2(+166.5kb)                                                                                                                                        |                                                                                             |                 |                    |
| rs10013748  | 4   | 94,018,593  | C  | A  | 0.397 | 1.014 | 0.85 | 4.0E-06 | ----      | 6      | 0.04112 | 2688    | 7031       | GRID2(0)                                                                                                                                               |                                                                                             |                 |                    |
| rs909701    | 22  | 44,973,368  | G  | C  | 0.500 | 0.999 | 1.17 | 4.1E-06 | +++++     | 6      | 0.1491  | 2688    | 7031       | ARHGAP8(-175.1kb) LDOC1(+79.36kb) LINC00207(+5.039kb) LINC00229(-28.84kb) LOC101927526(+132.7kb) PRR5(-91.06kb) PRR5-ARHGAP8(-125kb)                   |                                                                                             |                 |                    |
| rs9423449   | 10  | 5,611,602   | T  | A  | 0.348 | 0.978 | 1.18 | 4.2E-06 | +++++     | 6      | 0.2054  | 2688    | 7031       | ASB13(-69.22kb) CALML3(+43.37kb) CALML3-AS1(+43.39kb) CALML5(+70.07kb) FAM208B(-115.2kb) GDI2(-195.6kb) NET1(+110.6kb) TUBAL3(+164.8kb) UCN3(+195.4kb) |                                                                                             |                 |                    |
| rs1369169   | 4   | 93,740,409  | G  | T  | 0.471 | 0.993 | 1.17 | 4.2E-06 | +++++     | 6      | 0.5801  | 2688    | 7031       | GRID2(0)                                                                                                                                               | NME1, NME1-NME2, NME2, CPZ, SNIP, BTBD14B, C22orf13, NUDT16L1, MESP1                        |                 |                    |
| rs9952159   | 18  | 3,660,801   | T  | C  | 0.220 | 1.026 | 1.20 | 4.2E-06 | +++++     | 6      | 0.6642  | 2688    | 7031       | DLGAP1(0) DLGAP1-AS1(+63.42kb) DLGAP1-AS2(+50.71kb) LOC100505592(+181.8kb)                                                                             | MXI1, EGR3, FKS43, HIG2, FRMD8, ANKZF1, VEGFA                                               |                 |                    |
| rs9423448   | 10  | 5,611,426   | A  | T  | 0.348 | 0.977 | 1.18 | 4.2E-06 | +++++     | 6      | 0.205   | 2688    | 7031       | ASB13(-69.39kb) CALML3(+43.2kb) CALML3-AS1(+43.22kb) CALML5(+69.89kb) FAM208B(-115.4kb) GDI2(-195.8kb) NET1(+110.4kb) TUBAL3(+164.6kb) UCN3(+195.3kb)  |                                                                                             |                 |                    |
| rs7684707   | 4   | 94,219,390  | A  | G  | 0.283 | 1.013 | 1.19 | 4.3E-06 | +++++     | 6      | 0.3505  | 2688    | 7031       | GRID2(0)                                                                                                                                               |                                                                                             |                 |                    |
| rs7386816   | 8   | 128,575,522 | A  | C  | 0.283 | 0.953 | 1.19 | 4.4E-06 | +++++     | 6      | 0.7548  | 2688    | 7031       | CASC8(+81.14kb) CASC11(-137.3kb) CASC21(+170.6kb) CCAT2(+161.1kb) MYC(-172.8kb) POUSF1B(+146.1kb)                                                      |                                                                                             |                 |                    |
| rs752018    | 22  | 44,975,604  | G  | A  | 0.465 | 0.981 | 1.17 | 4.4E-06 | +++++     | 6      | 0.1385  | 2688    | 7031       | ARHGAP8(-172.8kb) LDOC1(+81.6kb) LINC00207(+7.275kb) LINC00229(-26.6kb) LOC101927526(+134.9kb) PRR5(-88.82kb) PRR5-ARHGAP8(-122.8kb)                   |                                                                                             |                 |                    |
| rs77885126  | 18  | 58,420,429  | C  | T  | 0.015 | 0.932 | 1.83 | 4.4E-06 | +++++     | 6      | 0.5784  | 2688    | 7031       | .                                                                                                                                                      |                                                                                             |                 |                    |
| rs7683744   | 4   | 94,079,014  | A  | G  | 0.478 | 1.002 | 0.86 | 4.5E-06 | ----      | 6      | 0.04046 | 2688    | 7031       | GRID2(0)                                                                                                                                               | FSCN2, PTPRS                                                                                |                 |                    |
| rs1503211   | 4   | 94,079,508  | A  | G  | 0.479 | 1.003 | 0.86 | 4.5E-06 | ----      | 6      | 0.04326 | 2688    | 7031       | GRID2(0)                                                                                                                                               | PCP2, THUMP1, FSCN2, MLLT4, LOC730031                                                       |                 |                    |

|             |    |             |   |   |       |       |      |         |         |   |         |      |      |                                                                                                                                                                                                                                                                                                  |                                                |              |
|-------------|----|-------------|---|---|-------|-------|------|---------|---------|---|---------|------|------|--------------------------------------------------------------------------------------------------------------------------------------------------------------------------------------------------------------------------------------------------------------------------------------------------|------------------------------------------------|--------------|
| rs9423659   | 10 | 5,616,577   | T | C | 0.345 | 0.989 | 1.18 | 4.7E-06 | +++++   | 6 | 0.2286  | 2688 | 7031 | ASB13(-64.24kb) CALML3(+48.35kb) CALML3-AS1(+48.37kb) CALML5(+75.04kb) FAM208B(-110.2kb) GDI2(-190.6kb) NET1(+115.6kb) TUBAL3(+169.8kb)                                                                                                                                                          |                                                |              |
| rs12506519  | 4  | 94,014,156  | C | A | 0.395 | 1.014 | 0.85 | 4.7E-06 | ---+    | 6 | 0.04768 | 2688 | 7031 | GRID2(0)                                                                                                                                                                                                                                                                                         | GNG8,PCP2,RBM6,THUMPD1,AIFM2                   |              |
| rs10904526  | 10 | 5,610,171   | T | C | 0.347 | 0.974 | 1.18 | 4.8E-06 | +++++   | 6 | 0.2049  | 2688 | 7031 | ASB13(-70.65kb) CALML3(+41.94kb) CALML3-AS1(+41.96kb) CALML5(+68.64kb) FAM208B(-116.6kb) GDI2(-197kb) NET1(+109.2kb) TUBAL3(+163.4kb) UCN3(+194kb)                                                                                                                                               |                                                |              |
| rs13108174  | 4  | 6,243,647   | A | G | 0.368 | 0.716 | 1.29 | 4.8E-06 | ?+????  | 1 | 0.3508  | 1240 | 4671 | JAKMIP1(+41.33kb) LOC285484(+7.984kb) PPP2R2C(-78.66kb) WFS1(-27.93kb)                                                                                                                                                                                                                           |                                                |              |
| rs11663827  | 18 | 3,663,631   | A | G | 0.220 | 1.038 | 1.20 | 4.8E-06 | +++++   | 6 | 0.6152  | 2688 | 7031 | DLGAP1(0) DLGAP1-AS1(+66.25kb) DLGAP1-AS2(+53.54kb) LOC100505592(+184.7kb)                                                                                                                                                                                                                       | GMIP,FKSG43,FRMD8,PIIB,ATP2A3,ARPC1B,CP2,MESP1 | DLGAP1, TYMS |
| rs12640873  | 4  | 93,743,330  | G | T | 0.468 | 0.989 | 1.17 | 4.9E-06 | +++++   | 6 | 0.5986  | 2688 | 7031 | GRID2(0)                                                                                                                                                                                                                                                                                         |                                                |              |
| rs8096356   | 18 | 3,661,485   | T | C | 0.221 | 1.034 | 1.20 | 5.0E-06 | +++++   | 6 | 0.5574  | 2688 | 7031 | DLGAP1(0) DLGAP1-AS1(+64.11kb) DLGAP1-AS2(+51.4kb) LOC100505592(+182.5kb)                                                                                                                                                                                                                        | MXI1,FKSG43,FRMD8,ZNF692,EGR3,HIG2,MRPL45      | DLGAP1       |
| rs73116117  | 7  | 56,778,687  | A | G | 0.120 | 0.881 | 0.77 | 5.1E-06 | ---+    | 6 | 0.5521  | 2688 | 7031 | LOC100130849(-164.4kb) LOC101928401(+172.9kb)                                                                                                                                                                                                                                                    |                                                |              |
| rs11663984  | 18 | 3,663,454   | T | C | 0.219 | 1.038 | 1.20 | 5.2E-06 | +++++   | 6 | 0.5745  | 2688 | 7031 | DLGAP1(0) DLGAP1-AS1(+66.08kb) DLGAP1-AS2(+53.37kb) LOC100505592(+184.5kb)                                                                                                                                                                                                                       |                                                |              |
| rs10773765  | 12 | 130,767,334 | T | C | 0.252 | 0.907 | 1.20 | 5.2E-06 | +++++   | 6 | 0.4338  | 2688 | 7031 | FZD10(+117kb) FZD10-AS1(+121.1kb) PIWIL1(-55.1kb) RIMBP2(-113.3kb)                                                                                                                                                                                                                               |                                                |              |
| rs8096569   | 18 | 3,661,277   | C | A | 0.221 | 1.031 | 1.20 | 5.4E-06 | +++++   | 6 | 0.6036  | 2688 | 7031 | DLGAP1(0) DLGAP1-AS1(+63.9kb) DLGAP1-AS2(+51.19kb) LOC100505592(+182.3kb)                                                                                                                                                                                                                        |                                                | DLGAP1       |
| rs4403008   | 4  | 94,023,965  | C | T | 0.396 | 1.015 | 0.86 | 5.5E-06 | ---+    | 6 | 0.03689 | 2688 | 7031 | GRID2(0)                                                                                                                                                                                                                                                                                         |                                                |              |
| rs12676089  | 8  | 128,576,704 | A | T | 0.283 | 0.949 | 1.19 | 5.6E-06 | +++++   | 6 | 0.7538  | 2688 | 7031 | CASC8(+82.32kb) CASC11(-136.1kb) CASC21(+171.8kb) CCAT2(+162.3kb) MYC(-171.6kb) POU5F1B(+147.3kb)                                                                                                                                                                                                |                                                |              |
| rs9544927   | 13 | 79,505,864  | G | A | 0.208 | 0.996 | 0.82 | 5.7E-06 | +-----  | 6 | 0.2514  | 2688 | 7031 | LINC00331(+91.68kb)                                                                                                                                                                                                                                                                              |                                                |              |
| rs12543106  | 8  | 128,573,298 | G | A | 0.286 | 0.973 | 1.18 | 5.8E-06 | +++++   | 6 | 0.7651  | 2688 | 7031 | CASC8(+78.91kb) CASC11(-139.6kb) CASC21(+168.4kb) CCAT2(+158.9kb) MYC(-175kb) POU5F1B(+143.9kb)                                                                                                                                                                                                  |                                                | RNF139       |
| rs6845206   | 4  | 94,228,306  | T | C | 0.276 | 0.985 | 1.19 | 6.0E-06 | +++++   | 6 | 0.4753  | 2688 | 7031 | GRID2(0)                                                                                                                                                                                                                                                                                         |                                                |              |
| rs10440323  | 4  | 94,018,909  | G | A | 0.417 | 1.013 | 0.86 | 6.0E-06 | ---+    | 6 | 0.08006 | 2688 | 7031 | GRID2(0)                                                                                                                                                                                                                                                                                         |                                                |              |
| rs28599745  | 1  | 153,396,665 | A | G | 0.160 | 0.650 | 0.70 | 6.0E-06 | ---???? | 2 | 0.416   | 1331 | 4926 | LOR(+162.1kb) PGLYRP3(+113.5kb) PGLYRP4(+75.64kb) S100A2(-136.9kb) S100A3(-123.1kb) S100A4(-119.4kb) S100A5(-113kb) S100A6(-110.4kb) S100A7(-33.55kb) S100A7A(+0.964kb) S100A7L2(-12.8kb) S100A8(+33kb) S100A9(+63.16kb) S100A12(+48.59kb) S100A13(-194.6kb) S100A14(-190.1kb) S100A16(-182.7kb) |                                                |              |
| rs2904475   | 4  | 94,080,358  | G | A | 0.385 | 1.015 | 0.86 | 6.0E-06 | ---+    | 6 | 0.07271 | 2688 | 7031 | GRID2(0)                                                                                                                                                                                                                                                                                         |                                                |              |
| rs1652783   | 8  | 73,279,728  | G | A | 0.225 | 0.764 | 1.31 | 6.1E-06 | +++???? | 2 | 0.3298  | 1331 | 4926 | KCNB2(-169.9kb) LOC392232(+115.9kb)                                                                                                                                                                                                                                                              |                                                |              |
| rs190543171 | 5  | 15,840,912  | T | C | 0.012 | 0.787 | 2.32 | 6.1E-06 | ?+????+ | 2 | 0.7686  | 1870 | 5301 | FBXL7(0)                                                                                                                                                                                                                                                                                         |                                                |              |
| rs4634186   | 4  | 94,013,482  | C | T | 0.396 | 1.013 | 0.86 | 6.1E-06 | ---+    | 6 | 0.04065 | 2688 | 7031 | GRID2(0)                                                                                                                                                                                                                                                                                         |                                                |              |
| rs2349634   | 22 | 44,973,739  | G | A | 0.476 | 1.022 | 1.16 | 6.2E-06 | +++++   | 6 | 0.1413  | 2688 | 7031 | ARHGAP8(-174.7kb) LDOC1L(+79.73kb) LINC00207(+5.41kb) LINC00229(-28.47kb) LOC101927526(+133.1kb) PRR5(-90.69kb) PRR5-ARHGAP8(-124.6kb)                                                                                                                                                           |                                                |              |
| rs7661294   | 4  | 94,078,957  | A | T | 0.385 | 1.015 | 0.86 | 6.2E-06 | ---+    | 6 | 0.07023 | 2688 | 7031 | GRID2(0)                                                                                                                                                                                                                                                                                         | PCP2,FAM100A,ZNF333                            |              |
| rs2349632   | 22 | 44,973,582  | C | T | 0.479 | 1.011 | 1.16 | 6.2E-06 | +++++   | 6 | 0.1592  | 2688 | 7031 | ARHGAP8(-174.9kb) LDOC1L(+79.58kb) LINC00207(+5.253kb) LINC00229(-28.62kb) LOC101927526(+132.9kb) PRR5(-90.84kb) PRR5-ARHGAP8(-124.8kb)                                                                                                                                                          |                                                |              |
| rs4303948   | 4  | 94,019,351  | C | T | 0.417 | 1.012 | 0.86 | 6.2E-06 | ---+    | 6 | 0.0726  | 2688 | 7031 | GRID2(0)                                                                                                                                                                                                                                                                                         |                                                |              |
| rs7686545   | 4  | 94,003,724  | G | A | 0.396 | 1.011 | 0.86 | 6.3E-06 | ---+    | 6 | 0.06288 | 2688 | 7031 | GRID2(0)                                                                                                                                                                                                                                                                                         | GNG8,PCP2,RBM6,THUMPD1,AIFM2                   |              |
| rs1580154   | 4  | 93,886,124  | C | T | 0.466 | 0.991 | 1.17 | 6.4E-06 | +++++   | 6 | 0.7539  | 2688 | 7031 | GRID2(0)                                                                                                                                                                                                                                                                                         |                                                |              |
| rs742197    | 22 | 44,974,888  | C | T | 0.475 | 0.995 | 1.16 | 6.4E-06 | +++++   | 6 | 0.138   | 2688 | 7031 | ARHGAP8(-173.5kb) LDOC1L(+80.88kb) LINC00207(+6.559kb) LINC00229(-27.32kb) LOC101927526(+134.2kb) PRR5(-89.54kb) PRR5-ARHGAP8(-123.5kb)                                                                                                                                                          |                                                |              |
| rs1032805   | 4  | 94,081,381  | A | G | 0.455 | 1.001 | 0.86 | 6.5E-06 | ---+    | 6 | 0.03802 | 2688 | 7031 | GRID2(0)                                                                                                                                                                                                                                                                                         |                                                |              |
| rs11081062  | 18 | 3,662,879   | T | C | 0.221 | 1.042 | 1.19 | 6.5E-06 | +++++   | 6 | 0.5564  | 2688 | 7031 | DLGAP1(0) DLGAP1-AS1(+65.5kb) DLGAP1-AS2(+52.79kb) LOC100505592(+183.9kb)                                                                                                                                                                                                                        |                                                | DLGAP1       |
| rs5765829   | 22 | 44,973,794  | G | C | 0.477 | 1.015 | 1.16 | 6.6E-06 | +++++   | 6 | 0.1435  | 2688 | 7031 | ARHGAP8(-174.6kb) LDOC1L(+79.79kb) LINC00207(+5.465kb) LINC00229(-28.41kb) LOC101927526(+133.1kb) PRR5(-90.63kb) PRR5-ARHGAP8(-124.6kb)                                                                                                                                                          |                                                |              |
| rs9958046   | 18 | 3,662,259   | T | C | 0.221 | 1.038 | 1.19 | 6.6E-06 | +++++   | 6 | 0.5252  | 2688 | 7031 | DLGAP1(0) DLGAP1-AS1(+64.88kb) DLGAP1-AS2(+52.17kb) LOC100505592(+183.3kb)                                                                                                                                                                                                                       |                                                |              |
| rs2349631   | 22 | 44,973,337  | C | A | 0.479 | 1.006 | 1.16 | 6.8E-06 | +++++   | 6 | 0.17    | 2688 | 7031 | ARHGAP8(-175.1kb) LDOC1L(+79.33kb) LINC00207(+5.008kb) LINC00229(-28.87kb) LOC101927526(+132.7kb) PRR5(-91.09kb) PRR5-ARHGAP8(-125kb)                                                                                                                                                            |                                                |              |

|             |    |             |   |   |       |       |      |         |         |   |         |      |      |                                                                                                                                         |                                                                                                                                                                         |
|-------------|----|-------------|---|---|-------|-------|------|---------|---------|---|---------|------|------|-----------------------------------------------------------------------------------------------------------------------------------------|-------------------------------------------------------------------------------------------------------------------------------------------------------------------------|
| rs5765830   | 22 | 44,974,010  | C | T | 0.477 | 1.011 | 1.16 | 6.8E-06 | ++++++  | 6 | 0.1435  | 2688 | 7031 | ARHGAP8(-174.4kb) LDOC1L(+80kb) LINC00207(+5.681kb) LINC00229(-28.2kb) LOC101927526(+133.3kb) PRRS(-90.42kb) PRRS-ARHGAP8(-124.4kb)     | NID1,DHRS13                                                                                                                                                             |
| rs742195    | 22 | 44,974,738  | A | G | 0.476 | 1.000 | 1.16 | 6.9E-06 | ++++++  | 6 | 0.1408  | 2688 | 7031 | ARHGAP8(-173.7kb) LDOC1L(+80.73kb) LINC00207(+6.409kb) LINC00229(-27.47kb) LOC101927526(+134.1kb) PRRS(-89.69kb) PRRS-ARHGAP8(-123.6kb) |                                                                                                                                                                         |
| rs7228243   | 18 | 3,662,693   | T | C | 0.223 | 1.031 | 1.19 | 6.9E-06 | ++++++  | 6 | 0.4864  | 2688 | 7031 | DLGAP1(0) DLGAP1-AS1(+65.32kb) DLGAP1-AS2(+52.61kb) LOC100505592(+183.7kb)                                                              |                                                                                                                                                                         |
| rs55760643  | 2  | 139,823,131 | T | C | 0.284 | 0.997 | 1.18 | 7.0E-06 | ++++++  | 6 | 0.6235  | 2688 | 7031 | YY1P2(+166.4kb)                                                                                                                         |                                                                                                                                                                         |
| rs10021088  | 4  | 94,059,475  | C | T | 0.479 | 0.997 | 0.86 | 7.0E-06 | ----    | 6 | 0.04628 | 2688 | 7031 | GRID2(0)                                                                                                                                | THUMPDI,LOC730031,MLLT4,PCP2,FSCN2                                                                                                                                      |
| rs56025909  | 20 | 955,893     | T | C | 0.368 | 0.960 | 1.51 | 7.2E-06 | ++++++  | 6 | 0.5124  | 2688 | 7031 | ANGPT4(+58.93kb) FAM110A(+129kb) PSMF1(-138kb) RSPO4(0)                                                                                 |                                                                                                                                                                         |
| rs73116130  | 7  | 56,793,465  | G | A | 0.119 | 0.864 | 0.77 | 7.2E-06 | ----    | 6 | 0.5264  | 2688 | 7031 | LOC100130849(-149.6kb) LOC101928401(+187.6kb)                                                                                           |                                                                                                                                                                         |
| rs11081061  | 18 | 3,662,784   | A | G | 0.220 | 1.039 | 1.19 | 7.3E-06 | ++++++  | 6 | 0.5227  | 2688 | 7031 | DLGAP1(0) DLGAP1-AS1(+65.41kb) DLGAP1-AS2(+52.7kb) LOC100505592(+183.8kb)                                                               |                                                                                                                                                                         |
| rs16841562  | 2  | 139,821,308 | A | T | 0.285 | 0.993 | 1.18 | 7.3E-06 | ++++++  | 6 | 0.5956  | 2688 | 7031 | YY1P2(+164.6kb)                                                                                                                         | HIST1H2AG,SNORA60,FBXL12,SNHG11,SNORA39,FKSG24,BTBD14B,C16orf58,HIST1H2AI,HIST1H2AJ,HIST1H2AK,HIST1H2AL,HIST1H2AM,KIAA0409,LOC100128371,NFKBIB,PHF23,SS18L1,TEX2,ZNF342 |
| rs60399004  | 2  | 139,827,099 | A | G | 0.285 | 0.997 | 1.18 | 7.3E-06 | ++++++  | 6 | 0.6266  | 2688 | 7031 | YY1P2(+170.4kb)                                                                                                                         |                                                                                                                                                                         |
| rs1566743   | 4  | 94,081,594  | A | G | 0.387 | 1.017 | 0.86 | 7.4E-06 | ----    | 6 | 0.07649 | 2688 | 7031 | GRID2(0)                                                                                                                                |                                                                                                                                                                         |
| rs3097331   | 19 | 34,648,956  | C | T | 0.368 | 1.000 | 0.85 | 7.5E-06 | -----   | 6 | 0.8402  | 2688 | 7031 | KIAA0355(-96.5kb) LSM14A(-14.4kb)                                                                                                       |                                                                                                                                                                         |
| rs1840717   | 4  | 93,956,435  | C | T | 0.462 | 0.990 | 1.16 | 7.5E-06 | ++++++  | 6 | 0.6771  | 2688 | 7031 | GRID2(0)                                                                                                                                |                                                                                                                                                                         |
| rs2482998   | 19 | 34,648,471  | G | A | 0.368 | 1.001 | 0.85 | 7.5E-06 | -----   | 6 | 0.8388  | 2688 | 7031 | KIAA0355(-96.98kb) LSM14A(-14.88kb)                                                                                                     | LHX2,USP3,AUTS2,PIGC,LOC253842,TNFAIP2,SUMO1P3,SUMO1,PI16,PAQR8,NR6A1,HEYL,CSF1,CLYBL                                                                                   |
| rs1110731   | 18 | 3,664,989   | T | A | 0.221 | 1.029 | 1.19 | 7.5E-06 | ++++++  | 6 | 0.5668  | 2688 | 7031 | DLGAP1(0) DLGAP1-AS1(+67.61kb) DLGAP1-AS2(+54.9kb) LOC100505592(+186kb)                                                                 | HEBP2<br>DLGAP1, TYMS                                                                                                                                                   |
| rs9530835   | 13 | 79,497,589  | A | G | 0.218 | 0.993 | 0.83 | 7.6E-06 | +-----  | 6 | 0.3573  | 2688 | 7031 | LINC00331(+83.4kb)                                                                                                                      | HS3ST2                                                                                                                                                                  |
| rs10445693  | 2  | 139,829,824 | C | A | 0.276 | 0.988 | 1.18 | 7.6E-06 | ++++++  | 6 | 0.505   | 2688 | 7031 | YY1P2(+173.1kb)                                                                                                                         |                                                                                                                                                                         |
| rs138445568 | 3  | 143,922,936 | T | A | 0.013 | 0.630 | 2.53 | 7.7E-06 | ??+?+?+ | 2 | 0.5001  | 1947 | 5015 | .                                                                                                                                       |                                                                                                                                                                         |
| rs1460411   | 18 | 3,662,130   | A | G | 0.221 | 1.037 | 1.19 | 7.7E-06 | ++++++  | 6 | 0.5287  | 2688 | 7031 | DLGAP1(0) DLGAP1-AS1(+64.75kb) DLGAP1-AS2(+52.04kb) LOC100505592(+183.2kb)                                                              | HEBP2<br>DLGAP1                                                                                                                                                         |
| rs139286049 | 9  | 20,688,387  | G | A | 0.019 | 0.760 | 1.82 | 7.8E-06 | ++++++  | 6 | 0.5419  | 2688 | 7031 | FOCAD(0) MIR491(-27.72kb) MIR4474(+186kb) MLLT3(+65.84kb)                                                                               |                                                                                                                                                                         |
| rs111823161 | 20 | 957,110     | C | A | 0.031 | 0.955 | 1.52 | 7.8E-06 | ++++++  | 6 | 0.3926  | 2688 | 7031 | ANGPT4(+60.15kb) FAM110A(+130.2kb) PSMF1(-136.8kb) RSPO4(0)                                                                             |                                                                                                                                                                         |
| rs12509022  | 4  | 55,515,175  | C | T | 0.381 | 0.911 | 1.17 | 8.0E-06 | ++++++  | 6 | 0.5655  | 2688 | 7031 | KIT(-8.919kb)                                                                                                                           |                                                                                                                                                                         |
| rs13115341  | 4  | 94,062,766  | G | A | 0.386 | 1.015 | 0.86 | 8.0E-06 | ----    | 6 | 0.07528 | 2688 | 7031 | GRID2(0)                                                                                                                                |                                                                                                                                                                         |
| rs752019    | 22 | 44,975,336  | G | A | 0.476 | 0.989 | 1.16 | 8.1E-06 | -----   | 6 | 0.1332  | 2688 | 7031 | ARHGAP8(-173.1kb) LDOC1L(+81.33kb) LINC00207(+7.007kb) LINC00229(-26.87kb) LOC101927526(+134.7kb) PRRS(-89.09kb) PRRS-ARHGAP8(-123kb)   |                                                                                                                                                                         |
| rs12511683  | 4  | 94,076,871  | A | G | 0.454 | 1.001 | 0.86 | 8.1E-06 | ----    | 6 | 0.03974 | 2688 | 7031 | GRID2(0)                                                                                                                                |                                                                                                                                                                         |
| rs12651392  | 4  | 94,072,846  | A | G | 0.454 | 1.000 | 0.86 | 8.1E-06 | ----    | 6 | 0.04551 | 2688 | 7031 | GRID2(0)                                                                                                                                |                                                                                                                                                                         |
| rs1260608   | 19 | 34,643,774  | T | C | 0.368 | 1.002 | 0.86 | 8.1E-06 | -----   | 6 | 0.846   | 2688 | 7031 | KIAA0355(-101.7kb) LSM14A(-19.58kb)                                                                                                     | LHX2,USP3,AUTS2,PIGC,LOC253842,TNFAIP2,SUMO1,PI16,SUMO1P3,PAQR8,NR6A1,CLYBL,CSF1,HEYL<br>IL29<br>IL28A,ZNF546,HSPB6,LAGALS4,SEPTAD3                                     |
| rs10928684  | 2  | 139,822,017 | G | C | 0.285 | 0.993 | 1.18 | 8.1E-06 | ++++++  | 6 | 0.6043  | 2688 | 7031 | ARHGAP8(-173.1kb) LDOC1L(+81.33kb) LINC00207(+7.007kb) LINC00229(-26.87kb) LOC101927526(+134.7kb) PRRS(-89.09kb) PRRS-ARHGAP8(-123kb)   | HIST1H2AG,FKSG24,FBXL12,SNORA39,SNORA60,SNHG11,BTBD14B,NFKBIB,HIST1H2AI,HIST1H2AJ,HIST1H2AK,HIST1H2AL,HIST1H2AM,KIAA0409,ZNF342,PHF23,C16orf58,SS18L1,LOC100128371      |
| rs146238482 | 9  | 20,856,226  | C | G | 0.010 | 0.823 | 2.68 | 8.1E-06 | ??+???  | 1 | 0.4127  | 1130 | 4257 | FOCAD(0) MIR491(+140kb) PTPLAD2(-150.1kb)                                                                                               |                                                                                                                                                                         |
| rs6824206   | 4  | 94,049,584  | C | T | 0.385 | 1.020 | 0.86 | 8.1E-06 | ----    | 6 | 0.06976 | 2688 | 7031 | GRID2(0)                                                                                                                                | PCP2,FAM100A                                                                                                                                                            |
| rs4090350   | 13 | 79,498,089  | G | C | 0.216 | 0.979 | 0.83 | 8.2E-06 | +-----  | 6 | 0.3779  | 2688 | 7031 | LINC00331(+83.9kb)                                                                                                                      |                                                                                                                                                                         |
| rs4286490   | 4  | 94,048,131  | A | G | 0.386 | 1.019 | 0.86 | 8.2E-06 | ----    | 6 | 0.0682  | 2688 | 7031 | GRID2(0)                                                                                                                                | FAM100A,PCP2,GPR3                                                                                                                                                       |
| rs12499828  | 4  | 94,014,306  | A | G | 0.392 | 1.013 | 0.86 | 8.3E-06 | ----    | 6 | 0.03536 | 2688 | 7031 | GRID2(0)                                                                                                                                |                                                                                                                                                                         |
| rs6838743   | 4  | 94,061,119  | G | A | 0.379 | 1.011 | 0.86 | 8.3E-06 | ----    | 6 | 0.09544 | 2688 | 7031 | GRID2(0)                                                                                                                                | C9orf148,TLLT11,PCP2,FAM100A,CCDC78,ADAD2                                                                                                                               |
| rs35894340  | 18 | 54,307,062  | G | A | 0.252 | 0.948 | 1.19 | 8.4E-06 | ++++++  | 6 | 0.2168  | 2688 | 7031 | TXNL1(+1.142kb) WDR7(-11.55kb)                                                                                                          |                                                                                                                                                                         |
| rs11097358  | 4  | 94,064,059  | A | G | 0.478 | 1.000 | 0.86 | 8.5E-06 | ----    | 6 | 0.05916 | 2688 | 7031 | GRID2(0)                                                                                                                                | THUMPDI,PCP2,FSCN2,MLLT4,LOC730031                                                                                                                                      |
| rs1354296   | 4  | 94,075,263  | A | G | 0.453 | 1.001 | 0.86 | 8.5E-06 | ----    | 6 | 0.05111 | 2688 | 7031 | GRID2(0)                                                                                                                                | LOC730031,MLLT4,CALY,IK,FSCN2,RBM6,SART3                                                                                                                                |
| rs10956374  | 8  | 128,576,335 | C | G | 0.284 | 0.949 | 1.18 | 8.6E-06 | ++++++  | 6 | 0.7217  | 2688 | 7031 | CASC8(+81.95kb) CASC11(-136.5kb) CASC21(+171.5kb) CCAT2(+161.9kb) MYC(-172kb) POU5F1B(+146.9kb)                                         |                                                                                                                                                                         |
| rs944117    | 20 | 939,600     | T | C | 0.032 | 0.982 | 1.50 | 8.6E-06 | ++++++  | 6 | 0.6141  | 2688 | 7031 | ANGPT4(+42.64kb) FAM110A(+112.7kb) PSMF1(-154.3kb) RSPO4(0) SLC52A3(+190.4kb)                                                           |                                                                                                                                                                         |
| rs2870681   | 4  | 94,073,948  | C | A | 0.386 | 1.018 | 0.86 | 8.6E-06 | ----    | 6 | 0.07379 | 2688 | 7031 | GRID2(0)                                                                                                                                |                                                                                                                                                                         |
| rs4693308   | 4  | 94,047,317  | T | C | 0.385 | 1.019 | 0.86 | 8.7E-06 | ----    | 6 | 0.06801 | 2688 | 7031 | GRID2(0)                                                                                                                                |                                                                                                                                                                         |
| rs1160036   | 4  | 94,046,870  | T | C | 0.385 | 1.020 | 0.86 | 8.8E-06 | ----    | 6 | 0.06852 | 2688 | 7031 | GRID2(0)                                                                                                                                | PCP2,FAM100A                                                                                                                                                            |
| rs4574371   | 4  | 94,070,268  | T | C | 0.386 | 1.016 | 0.86 | 8.8E-06 | ----    | 6 | 0.07572 | 2688 | 7031 | GRID2(0)                                                                                                                                | C9orf75,PCP2,MAP2K6,TLLT11,C9orf148,FAM100A,ADAD2                                                                                                                       |
| rs1260555   | 19 | 34,640,591  | T | C | 0.371 | 0.979 | 0.85 | 8.8E-06 | -----   | 6 | 0.8201  | 2688 | 7031 | KIAA0355(-104.9kb) LSM14A(-22.76kb)                                                                                                     |                                                                                                                                                                         |
| rs1503212   | 4  | 94,075,844  | A | T | 0.455 | 1.000 | 0.86 | 8.9E-06 | ----    | 6 | 0.04179 | 2688 | 7031 | GRID2(0)                                                                                                                                | SPIRE1,CDK2AP1                                                                                                                                                          |

|             |    |             |   |   |       |       |      |         |         |   |         |      |      |                                                                                                                                                                                  |                                                             |
|-------------|----|-------------|---|---|-------|-------|------|---------|---------|---|---------|------|------|----------------------------------------------------------------------------------------------------------------------------------------------------------------------------------|-------------------------------------------------------------|
| rs10030263  | 4  | 94,077,149  | A | G | 0.384 | 1.015 | 0.86 | 8.9E-06 | ---+--- | 6 | 0.05839 | 2688 | 7031 | GRID2(0)                                                                                                                                                                         | PCP2,FAM100A                                                |
| rs10445690  | 2  | 139,827,658 | A | G | 0.282 | 0.989 | 1.18 | 8.9E-06 | ++++++  | 6 | 0.5404  | 2688 | 7031 | YY1P2(+170.9kb)                                                                                                                                                                  |                                                             |
| rs17264265  | 4  | 94,052,135  | G | A | 0.384 | 1.015 | 0.86 | 9.0E-06 | ---+--- | 6 | 0.07231 | 2688 | 7031 | GRID2(0)                                                                                                                                                                         | PCP2,FSCN2,IK,C9orf148,TTL11,CALY                           |
| rs13142145  | 4  | 94,071,488  | A | G | 0.386 | 1.017 | 0.86 | 9.1E-06 | ---+--- | 6 | 0.07439 | 2688 | 7031 | GRID2(0)                                                                                                                                                                         |                                                             |
| rs12510452  | 4  | 93,890,730  | T | A | 0.467 | 0.990 | 1.16 | 9.2E-06 | ++++++  | 6 | 0.7846  | 2688 | 7031 | GRID2(0)                                                                                                                                                                         |                                                             |
| rs13117401  | 4  | 94,071,296  | C | T | 0.386 | 1.017 | 0.86 | 9.3E-06 | ---+--- | 6 | 0.07579 | 2688 | 7031 | GRID2(0)                                                                                                                                                                         | CALY                                                        |
| rs1566744   | 4  | 94,070,017  | G | A | 0.454 | 0.998 | 0.86 | 9.4E-06 | ---+--- | 6 | 0.0405  | 2688 | 7031 | GRID2(0)                                                                                                                                                                         |                                                             |
| rs17020045  | 4  | 93,892,487  | G | A | 0.469 | 0.996 | 1.16 | 9.4E-06 | ++++++  | 6 | 0.7178  | 2688 | 7031 | GRID2(0)                                                                                                                                                                         | CPZ,MESP1                                                   |
| rs149952789 | 7  | 12,716,170  | T | A | 0.010 | 0.603 | 3.33 | 9.6E-06 | ??+???? | 0 | 1       | 1032 | 4100 | ARL4A(-10.28kb) SCIN(+22.94kb)                                                                                                                                                   |                                                             |
| rs4444795   | 4  | 93,355,172  | T | C | 0.183 | 0.912 | 1.22 | 9.7E-06 | ++++++  | 6 | 0.8576  | 2688 | 7031 | GRID2(0)                                                                                                                                                                         |                                                             |
| rs75740353  | 2  | 242,741,686 | A | G | 0.103 | 0.869 | 0.65 | 9.7E-06 | ???---- | 3 | 0.2528  | 1357 | 2105 | ATG4B(+128.4kb) D2HGDH(+33.46kb) DTYMK(+115.3kb) GAL3ST2(0) ING5(+72.79kb) LINC01237(-81.83kb) LOC102723927(-171.1kb) NEU4(-8.473kb) PDCC1(-50.35kb) RTP5(-70.2kb) THAP4(+165kb) |                                                             |
| rs6844422   | 4  | 94,067,253  | A | G | 0.454 | 0.998 | 0.86 | 9.8E-06 | ---+--- | 6 | 0.04052 | 2688 | 7031 | GRID2(0)                                                                                                                                                                         | SPIRE1,CNTNAP1,FSCN2,RUFY1,CPZ,LOC730031,MLLT4,ATF5,CDK2AP1 |
| rs10022163  | 4  | 94,063,508  | A | G | 0.454 | 0.998 | 0.86 | 9.9E-06 | ---+--- | 6 | 0.04292 | 2688 | 7031 | GRID2(0)                                                                                                                                                                         |                                                             |
| rs9680008   | 20 | 946,803     | A | C | 0.032 | 0.980 | 1.50 | 9.9E-06 | ++++++  | 6 | 0.5461  | 2688 | 7031 | ANGPT4(+49.84kb) FAM110A(+119.9kb) PSMF1(-147.1kb) RSPO4(0) SLC52A3(+197.6kb)                                                                                                    |                                                             |
| rs116969557 | 13 | 77,337,736  | A | G | 0.016 | 0.957 | 1.77 | 9.9E-06 | ?+++--+ | 5 | 0.0639  | 2597 | 6776 | BTF3P11(-164.8kb) IRG1(-188.9kb) KCTD12(-116.6kb)                                                                                                                                |                                                             |
| rs1160035   | 4  | 94,046,761  | G | T | 0.381 | 1.017 | 0.86 | 9.9E-06 | ---+--- | 6 | 0.1026  | 2688 | 7031 | GRID2(0)                                                                                                                                                                         | PCP2,FAM100A                                                |
